# Supplementary material
Source: publisher figshare collection journal article supplement (https://gsajournals.figshare.com/ndownloader/files/21324315)
Supplement: Supplementary file 1 [file 21324315]

## Sheet: Table S5
Table S5. List of genes that possess sites of parallel substitutions.
Orthogroup	hgnc_symbol	focus_taxons	ancestral_residues	current_residues	expect_parallel_events	observed_parallel_events	parallel_site_position	p.value
OG0006758	ATXN1	['Gloydius_shedaoensis', 'Alligator_mississippiensis']	['S', 'S']	['G', 'G']	0.004344	1	42	0.004334
OG0007703	EDC4	['Gloydius_shedaoensis', 'Alligator_mississippiensis']	['I', 'I']	['V', 'V']	0.00447	1	733	0.00446
OG0007488	AVL9	['Gloydius_shedaoensis', 'Chrysemys_picta']	['C', 'C']	['S', 'S']	0.008161	1	18	0.008128
OG0006275	LMCD1	['Gloydius_shedaoensis', 'Alligator_mississippiensis']	['N', 'N']	['S', 'S']	0.012118	1	242	0.012045
OG0008429	RABEPK	['Gloydius_shedaoensis', 'Chrysemys_picta']	['E', 'E']	['K', 'K']	0.012586	1	111	0.012507
OG0007527	SOWAHD	['Gloydius_shedaoensis', 'Chrysemys_picta']	['R', 'R']	['C', 'C']	0.016815	1	106	0.016674
OG0006978	SYNE1	['Gloydius_shedaoensis', 'Chrysemys_picta']	['T', 'T']	['M', 'M']	0.019108	1	905	0.018927
OG0006058	AGXT2	['Gloydius_shedaoensis', 'Chrysemys_picta']	['V', 'V']	['I', 'I']	0.021143	1	211	0.020921
OG0006089	DKC1	['Gloydius_shedaoensis', 'Chrysemys_picta']	['S', 'S']	['N', 'N']	0.021389	1	157	0.021162
OG0006091	ADAMTS4	['Gloydius_shedaoensis', 'Alligator_mississippiensis']	['V', 'V']	['I', 'I']	0.023089	1	516	0.022824
OG0007843	LRIT1	['Gloydius_shedaoensis', 'Alligator_mississippiensis']	['S', 'S']	['N', 'N']	0.025658	1	299	0.025332
OG0009221	PRSS35	['Gloydius_shedaoensis', 'Alligator_mississippiensis']	['N', 'N']	['S', 'S']	0.04426	1	327	0.043295
OG0009221	PRSS35	['Gloydius_shedaoensis', 'Chrysemys_picta']	['N', 'N']	['S', 'S']	0.050599	1	327	0.04934
OG0005746	TDP2	['Gloydius_shedaoensis', 'Alligator_mississippiensis']	['L', 'L']	['V', 'V']	0.059805	1	137	0.058052
OG0005840	PLPP1	['Gloydius_shedaoensis', 'Alligator_mississippiensis']	['F', 'F']	['Y', 'Y']	0.063423	1	12	0.061454
OG0007301	SSR1	['Gloydius_shedaoensis', 'Chrysemys_picta']	['M', 'M']	['V', 'V']	0.159398	1	63	0.147343
OG0007850	ACAT1	['Gloydius_shedaoensis', 'Alligator_mississippiensis']	['I', 'I']	['V', 'V']	0.492926	1	93	0.389164
